# Supplementary material for: Incidence of Acute Kidney Injury in Polytrauma Patients and Predictive Performance of TIMP2 × IGFBP7 Biomarkers for Early Identification of Acute Kidney Injury
Source: MDPI journal article supplement (doi:10.3390/diagnostics12102481), 2022-10-13

## Supplemental material

### Supplemental Figure S1. Biological and Functional Markers

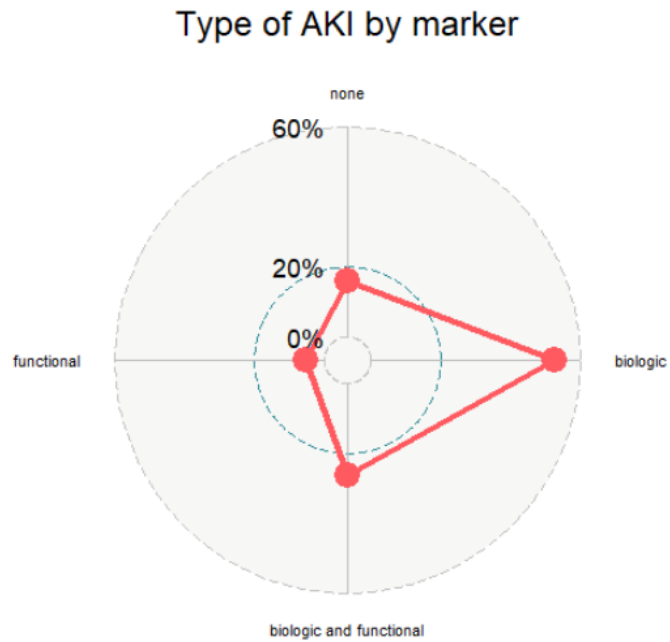

Supplemental Figure S2. Correlations Heat Maps

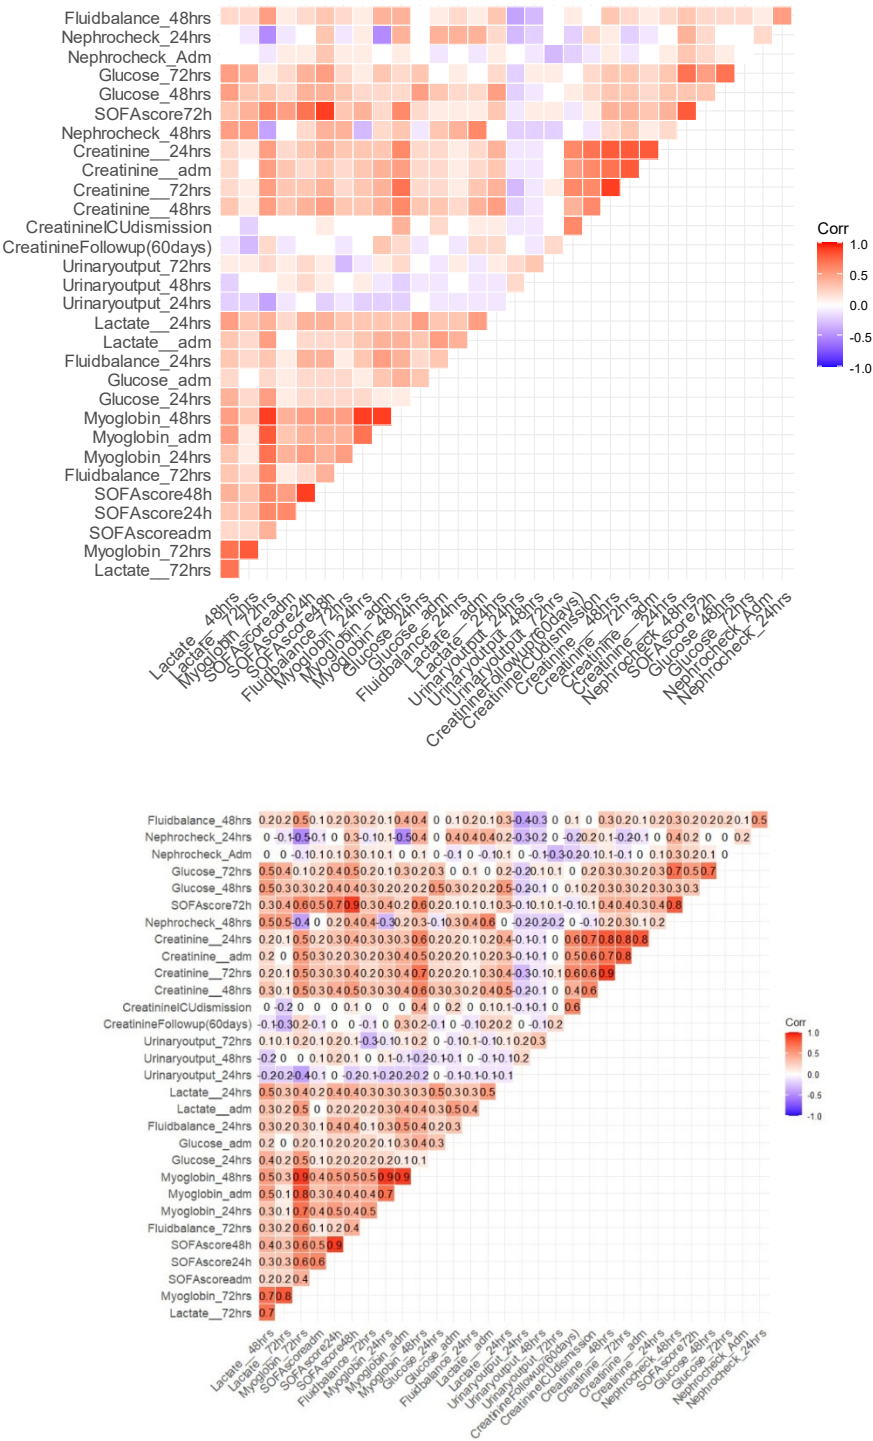

Association between continuous and categorical variables were tested through Wilcoxon signed-rank test.

**Supplemental Figure S3. ROC analysis of multivariable model**

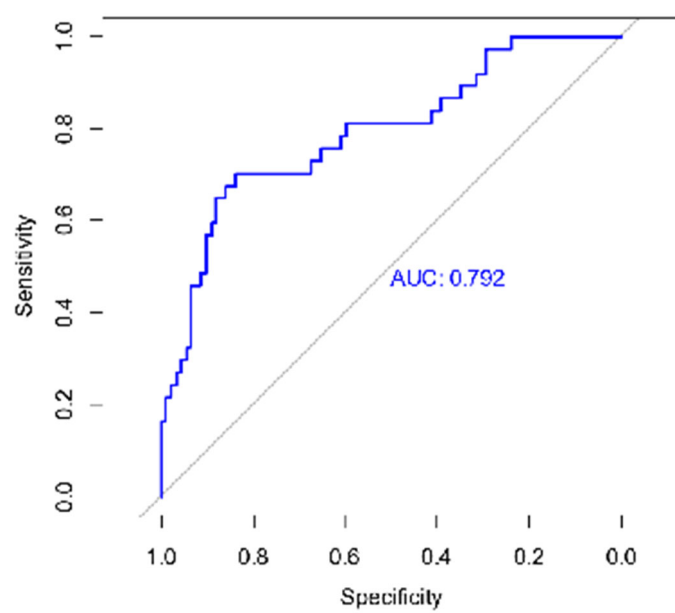

Supplement: s1 [file s1]
