# Supplementary material for: Incidence of Acute Kidney Injury in Polytrauma Patients and Predictive Performance of TIMP2 × IGFBP7 Biomarkers for Early Identification of Acute Kidney Injury
Source: MDPI journal article supplement (doi:10.3390/diagnostics12102481), 2022-10-13
Supplement: s1 [file s1]

## Supplemental Tables

Supplemental Table S1. Univariate-multivariate analysis.

| Characteristic                        | N   | Univariate      |                     |         | Multivariable   |                     |              |
|---------------------------------------|-----|-----------------|---------------------|---------|-----------------|---------------------|--------------|
|                                       |     | OR <sup>1</sup> | 95% CI <sup>1</sup> | p-value | OR <sup>1</sup> | 95% CI <sup>1</sup> | p-value      |
| <b>Age</b>                            | 152 | 1.05            | 1.03, 1.07          | <0.001  | 1.04            | 1.02, 1.07          | <b>0.002</b> |
| <b>Gender</b>                         | 152 |                 |                     |         |                 |                     |              |
| <b>Female</b>                         |     | —               | —                   |         | —               | —                   |              |
| <b>Male</b>                           |     | 1.93            | 0.73, 6.11          | 0.2     | 2.82            | 0.80, 12.3          | 0.13         |
| <b>BMI</b>                            | 152 | 1.08            | 0.99, 1.17          | 0.078   |                 |                     |              |
| <b>SBP</b>                            | 152 | 0.99            | 0.98, 1.00          | 0.13    |                 |                     |              |
| <b>FC</b>                             | 152 | 1.00            | 0.98, 1.01          | 0.8     |                 |                     |              |
| <b>Shock Index</b>                    | 152 | 1.55            | 0.50, 4.71          | 0.4     | 2.40            | 0.57, 9.41          | 0.2          |
| <b>ISS</b>                            | 151 | 0.98            | 0.95, 1.02          | 0.4     | 0.97            | 0.92, 1.02          | 0.3          |
| <b>GCS</b>                            | 152 | 1.02            | 0.94, 1.12          | 0.6     |                 |                     |              |
| <b>Type of injury</b>                 | 152 |                 |                     |         |                 |                     |              |
| <b>Blunt</b>                          |     | —               | —                   |         | —               | —                   |              |
| <b>Penetrating</b>                    |     | 1.79            | 0.50, 5.92          | 0.3     |                 |                     |              |
| <b>Injury Meccanism</b>               | 152 |                 |                     |         |                 |                     |              |
| <b>Bicycle hit</b>                    |     | —               | —                   |         | —               | —                   |              |
| <b>Fall &lt;6 m</b>                   |     | 1.70            | 0.45, 7.29          | 0.4     |                 |                     |              |
| <b>Fall &gt;6 m</b>                   |     | 2.83            | 0.30, 23.8          | 0.3     |                 |                     |              |
| <b>Machinery</b>                      |     | 1.42            | 0.06, 15.1          | 0.8     |                 |                     |              |
| <b>Motor vehicle traffic accident</b> |     | 2.13            | 0.55, 9.27          | 0.3     |                 |                     |              |
| <b>Motorcycle</b>                     |     | 2.02            | 0.57, 8.44          | 0.3     |                 |                     |              |
| <b>Other</b>                          |     | 1.59            | 0.38, 7.24          | 0.5     |                 |                     |              |
| <b>Pedestrian</b>                     |     | 2.32            | 0.54, 10.9          | 0.3     |                 |                     |              |
| <b>Type 2 diabetes</b>                | 152 | 1.90            | 0.59, 5.83          | 0.3     |                 |                     |              |
| <b>Hypertension</b>                   | 152 | 4.43            | 2.07, 9.66          | <0.001  |                 |                     |              |

| Characteristic                                    | N   | Univariate      |                     |         | Multivariable   |                     |              |
|---------------------------------------------------|-----|-----------------|---------------------|---------|-----------------|---------------------|--------------|
|                                                   |     | OR <sup>1</sup> | 95% CI <sup>1</sup> | p-value | OR <sup>1</sup> | 95% CI <sup>1</sup> | p-value      |
| <b>Anti-platelet and Anti-coagulation Therapy</b> | 152 | 5.28            | 2.29, 12.6          | <0.001  |                 |                     |              |
| <b>Previous cardiac disease</b>                   | 152 | 6.12            | 2.20, 18.8          | <0.001  | 3.75            | 1.05, 15.0          | <b>0.048</b> |
| <b>Previous renal disease</b>                     | 152 | 4.93            | 0.46, 108           | 0.2     |                 |                     |              |
| <b>[TIMP-2] × [IGFBP7] Admission*</b>             | 132 | 1.43            | 0.99, 2.09          | 0.055   | 1.53            | 0.99, 2.40          | 0.055        |

<sup>1</sup>OR = Odds Ratio, CI = Confidence Interval.\* For every unit increase in AKIrisk score.

**Supplemental Table S2: Renal Outcomes according to [TIMP-2] × [IGFBP7] values at admission**

| Characteristic             | Entire Cohort= 153 <sup>1</sup> | [TIMP-2] × [IGFBP7] Admission ≤0.03, N = 50 <sup>1</sup> | [TIMP-2] × [IGFBP7] Admission > 0.3 AKI, N = 82 <sup>1</sup> | p-value <sup>2</sup> |
|----------------------------|---------------------------------|----------------------------------------------------------|--------------------------------------------------------------|----------------------|
| <b>sCr Admission</b>       | 0.84 (0.70, 1.01)               | 0.82 (0.70, 0.99)                                        | 0.87 (0.71, 1.08)                                            | 0.3                  |
| <b>sCr 24hrs</b>           | 0.82 (0.70, 0.99)               | 0.80 (0.72, 0.95)                                        | 0.86 (0.70, 1.05)                                            | 0.2                  |
| <b>sCr 48hrs</b>           | 0.81 (0.68, 1.07)               | 0.78 (0.68, 0.92)                                        | 0.84 (0.72, 1.09)                                            | 0.3                  |
| <b>sCr 72hrs</b>           | 0.75 (0.64, 0.92)               | 0.74 (0.64, 0.85)                                        | 0.74 (0.66, 0.92)                                            | 0.8                  |
| <b>Myoglobin Admission</b> | 974 (458, 1,888)                | 964 (411, 2,888)                                         | 979 (518, 1,664)                                             | 0.8                  |
| <b>Myoglobin 24hrs</b>     | 1,354 (630, 2,705)              | 1,449 (662, 2,856)                                       | 1,362 (643, 2,741)                                           | 0.8                  |
| <b>Myoglobin 48hrs</b>     | 697 (258, 1,595)                | 774 (372, 1,076)                                         | 710 (211, 2,728)                                             | 0.7                  |
| <b>Myoglobin 72hrs</b>     | 835 (442, 2,236)                | 665 (442, 1,680)                                         | 893 (371, 1,366)                                             | >0.9                 |
| <b>Glucose Admission</b>   | 150 (128, 179)                  | 158 (131, 189)                                           | 148 (128, 177)                                               | 0.4                  |

| Characteristic   | Entire Cohort= 153 <sup>1</sup> | [TIMP-2] × [IGFBP7] Admission ≤0.03, N = 50 <sup>1</sup> | [TIMP-2] × [IGFBP7] Admission > 0.3 AKI, N = 82 <sup>1</sup> | p-value <sup>2</sup> |
|------------------|---------------------------------|----------------------------------------------------------|--------------------------------------------------------------|----------------------|
| Glucose 24hrs    | 135 (118, 160)                  | 143 (115, 167)                                           | 135 (121, 161)                                               | 0.7                  |
| Glucose 48hrs    | 129 (114, 152)                  | 130 (114, 149)                                           | 129 (118, 153)                                               | 0.8                  |
| Glucose 72hrs    | 129 (113, 150)                  | 137 (114, 156)                                           | 127 (116, 146)                                               | 0.4                  |
| PCT Admission    | 0.27 (0.07, 1.15)               | 0.14 (0.06, 0.54)                                        | 0.34 (0.11, 0.94)                                            | 0.5                  |
| PCT 24hrs        | 0.87 (0.32, 3.05)               | 1.65 (0.14, 5.10)                                        | 0.62 (0.33, 2.81)                                            | 0.5                  |
| PCT 48hrs        | 0.9 (0.5, 3.9)                  | 1.3 (0.8, 3.9)                                           | 1.6 (0.3, 4.6)                                               | 0.7                  |
| PCT 72hrs        | 0.7 (0.3, 2.1)                  | 1.3 (0.8, 2.8)                                           | 0.4 (0.3, 2.1)                                               | 0.063                |
| FB 24hrs         | 1,430 (457, 2,636)              | 1,441 (498, 3,100)                                       | 1,307 (446, 2,620)                                           | 0.8                  |
| FB 48hrs         | 850 (-16, 1,938)                | 727 (110, 1,823)                                         | 1,012 (61, 1,946)                                            | 0.7                  |
| FB 72hrs         | 860 (102, 1,671)                | 555 (104, 1,263)                                         | 1,021 (289, 2,004)                                           | 0.2                  |
| % FO 24hrs       | 18 (5, 35)                      | 18 (8, 36)                                               | 16 (5, 35)                                                   | 0.9                  |
| % FO 48hrs       | 11 (0, 25)                      | 11 (1, 25)                                               | 13 (1, 25)                                                   | 0.7                  |
| % FO 72hrs       | 11 (1, 20)                      | 7 (1, 17)                                                | 14 (4, 24)                                                   | 0.3                  |
| UO 24hrs         | 1,855 (1,289, 2,575)            | 1,910 (1,340, 2,950)                                     | 1,942 (1,322, 2,555)                                         | 0.7                  |
| UO 48hrs         | 2,300 (1,725, 3,000)            | 2,350 (1,725, 3,410)                                     | 2,110 (1,650, 2,850)                                         | 0.2                  |
| UO 72hrs         | 2,570 (1,888, 3,140)            | 2,775 (2,378, 3,442)                                     | 2,190 (1,770, 2,960)                                         | <b>0.015</b>         |
| Furosemide 24hrs | 42 (28%)                        | 12 (24%)                                                 | 27 (33%)                                                     | 0.3                  |
| Furosemide 48hrs | 41 (36%)                        | 16 (41%)                                                 | 22 (37%)                                                     | 0.7                  |
| Furosemide 72hrs | 22 (26%)                        | 9 (35%)                                                  | 12 (24%)                                                     | 0.4                  |
| RRT 24hrs        | 1 (0.7%)                        | 0 (0%)                                                   | 0 (0%)                                                       | >0.9                 |
| RRT 48hrs        | 4 (3.5%)                        | 0 (0%)                                                   | 3 (5.0%)                                                     | 0.3                  |
| RRT 72hrs        | 4 (4.7%)                        | 0 (0%)                                                   | 3 (6.1%)                                                     | 0.5                  |

<sup>1</sup>Median (IQR); n (%). <sup>2</sup>Wilcoxon rank sum test; Wilcoxon rank sum exact test. ACRONYM: FB, Fluid Balance; FO, Fluid Overload; PCT, procalcitonine; sCr, serum creatinine; RRT, renal replacement therapy; UO, urinary output.
